# Supplementary material for: Incidence and risk factors of herpes zoster among hiv-positive patients in the german competence network for HIV/AIDS (KompNet): a cohort study analysis
Source: Springer Nature journal article supplement (doi:10.1186/1471-2334-13-372), 2013-08-10
Supplement: 12879_2013_2578_MOESM1_ESM.pdf [file 12879_2013_2578_MOESM1_ESM.pdf]

n=16,636

patients in the cohort who gave informed consent

Patients excluded (n=2494) for

- Missing date of entry in cohort or age<18 at date of entry (n=536)
- Year of first positive HIV diagnosis unknown (n=537)
- ART more than 1 year before HIV diagnosis (n=28)
- No observation time documented or observation time less than 6 months (n=748)
- Duplicates of other patients in the data (n=309)
- "state after HZ" coded without plausible documented HZ before (n=231)
- HZ cases more than 1 month before first positive HIV diagnosis (n=105)

n = 14,142

patients corresponding to Concept Protocol  
"Overall study population"

n=10,359 excluded patients for subpopulation with documentation starting >6 months before  $T_0$  (n=31) or missing CD4 value  $\pm$  6 months around  $T_0$  (n=10,328)

n=3,783

Subpopulation with documentation period starting  $\pm$  6 months around diagnosis of HIV at  $T_0$  including a CD4 value, sub-population for incidence estimation

n=26 patients with HZ episodes without diagnosis month

n=3,757

Analysis population for Cox regression / initial HZ episodes  
"COX SUB-POPULATION"
